## Original article

## Effect of fibromyalgia syndrome on the health-related quality of life and economic burden in Korea

Seong-Kyu Kim<sup>1</sup>, Seong-Ho Kim<sup>2</sup>, Chang-Keun Lee<sup>3</sup>, Hye-Soon Lee<sup>4</sup>, Sang-Heon Lee<sup>5</sup>, Yong-Beom Park<sup>6</sup>, Hye-Jin Park<sup>7</sup>, Min-Jung Son<sup>7</sup> and Shin-Seok Lee<sup>8</sup>

## Abstract

**Objective.** To investigate the health-related quality of life (HRQOL) and economic burden of patients with FM syndrome (FMS) and compare the changes in these parameters 3 months before and after FMS diagnosis.

**Methods.** A total of 2098 patients with FMS (1818 previously diagnosed with FMS and 280 newly diagnosed with FMS) were enrolled in this study. The newly diagnosed patients with FMS participated in a 3-month prospective observational study to assess HRQOL and economic burden in terms of direct health-care costs, direct non-health-care costs and indirect costs. HRQOL was estimated using the Short Form 36 Health Survey.

**Results.** Mean (s.d.) scores obtained on the physical component summary (PCS) and mental component summary (MCS) scales by patients with FMS were 34.01 (7.28) and 37.29 (11.17), respectively. The total expenditure for the 3 months before enrolment was \$1481 (s.d. \$2206). Indirect costs [\$1126 (s.d. \$2016)] were about three times higher than direct costs [\$355 (s.d. \$534)]. The PCS and MCS scores increased to 4.03 (s.d. 6.79) and 4.06 (s.d. 10.57), respectively, 3 months after the initial FMS diagnosis ( $P < 0.001$ , both). Total expenditure after FMS diagnosis was reduced by \$1025 (s.d. \$1347) as compared with costs before FMS diagnosis ( $P < 0.001$ ).

**Conclusion.** Patients with FMS experience a decline in their HRQOL and constitute a significant economic burden on health-service utilization. The improvement in health-related costs and HRQOL after a diagnosis of FMS demonstrates a need for early diagnosis and treatment of FMS to reduce costs and enhance HRQOL.

**Key words:** fibromyalgia, health-care costs, quality of life.

<sup>1</sup>Department of Internal Medicine, Arthritis & Autoimmunity Research Center, Catholic University of Daegu School of Medicine, Daegu, <sup>2</sup>Division of Rheumatology, Department of Internal Medicine, Inje University Haeundae Paik Hospital, Busan, <sup>3</sup>Division of Rheumatology, Department of Internal Medicine, University of Ulsan College of Medicine, Asan Medical Center, Seoul, <sup>4</sup>Division of Rheumatology, Department of Internal Medicine, Guri Hospital, Hanyang University College of Medicine, Gyeonggi-do, <sup>5</sup>Division of Rheumatology, Department of Internal Medicine, Konkuk University School of Medicine, <sup>6</sup>Division of Rheumatology, Department of Internal Medicine, Yonsei University College of Medicine, <sup>7</sup>Pfizer Pharmaceuticals Korea Ltd, Seoul and <sup>8</sup>Department of Rheumatology, Chonnam National University Medical School, Gwangju, Republic of Korea.

Submitted 24 January 2012; revised version accepted 8 August 2012.

Correspondence to: Shin-Seok Lee, Department of Rheumatology, Chonnam National University Medical School, 5 Hak-Dong, Dong-gu, Gwangju 501-746, Republic of Korea.  
E-mail: shinseok@chonnam.ac.kr

## Introduction

FM syndrome (FMS) is a common chronic pain disorder characterized by widespread musculoskeletal pain with multiple tender points over the entire body and a wide range of related symptoms [1]. Data from an Internet survey performed by the National Fibromyalgia Association showed that patients with FMS complained of various neurological, psychological and constitutional symptoms/disturbances, including sleep disturbance, fatigue, morning stiffness, tingling sensation, headache, memory disturbance, depression and anxiety, in addition to widespread pain [2]. Long-term pain and emotional and physical disabilities related to FMS may lead to poor health-related quality of life (HRQOL) and a substantial economic burden.

In a comparative analysis of quality of life (QOL), Burckhardt *et al.* [3] demonstrated that the QOL of women with FMS was markedly worse than that of women with other painful disorders, including OA, RA and chronic obstructive pulmonary disease. Additional studies using various common QOL-related measures, such as the Fibromyalgia Impact Questionnaire (FIQ), the Quality of Well-being Scale and the Short Form 36 Health Survey (SF-36), have confirmed greater impairment in the QOL of patients with FMS compared with the general population or those without chronic disease conditions [4–9]. They have also demonstrated that some characteristics such as gender, disease duration, educational level, work status and self-rated health may influence QOL as assessed by the FIQ and SF-36 [9–11].

The substantial economic burden of FMS is a major issue that arises from chronic pain and emotional and physical disabilities [12–17]. A long-term prospective FMS outcome study has shown high levels of utilization of a number of medical services by patients with FMS [17], which is thought to be related to a greater incidence of symptoms and related morbidities in this group compared with patients with other rheumatic diseases. Although studies on health-care costs have been characterized by differences in methods of analysis and research design, the economic burden of patients with FMS in terms of health-care costs was 2- to 3-fold greater than that of control groups [12, 16]. Patients with FMS also reported far greater use of health-care resources, including office visits, prescriptions and diagnostic testing for the disease before than after the initial FMS diagnosis [13]. In addition to direct health-care costs, indirect costs related to the transient or permanent loss of productivity and the need for sick leave to treat FMS were clearly elevated in FMS patients [14, 15]. These data imply that FMS itself may contribute to increasing the economic burden secondary to high rates of health-service utilization, such as direct and indirect costs.

Although it is recognized that patients with FMS experience significantly impaired QOL and higher rates of service utilization related to FMS, there are limited data assessing the QOL and economic costs of newly diagnosed FMS patients and the changes of these parameters after the diagnosis of FMS as compared with established patients. The aims of this study were to assess the economic burden, work-related disability and HRQOL of newly diagnosed and established patients with FMS, and to compare these parameters before and after FMS diagnosis in newly diagnosed patients. We also sought to identify demographic and clinical risk factors associated with economic costs and work-related disability due to illness.

## Patients and methods

### Study design and population

This study enrolled 2098 patients with FMS recruited from outpatient clinics at 44 medical centres across the Republic of Korea. The study subjects were evaluated using the 1990 ACR classification criteria for a diagnosis of FMS [18]. Patients who had previously been diagnosed

with FMS ( $n = 1818$ ) were consecutively recruited from the rheumatology outpatient clinic at each medical centre. Additionally, subjects who were diagnosed as having FMS for the first time and who met the ACR criteria for FMS were regarded as newly diagnosed cases ( $n = 280$ ). The institutional review board/ethics committee at each medical centre approved the study (Chonnam National University Institutional Review Board, Catholic University of Daegu Hospital Institutional Review Board, Inje University Haeundae Paik Hospital Institutional Review Board, Asan Medical Center Institutional Review Board, Guri Hospital Institutional Review Board, Konkuk University Hospital Institutional Review Board and Severance Hospital Institutional Review Board). All study patients provided informed consent before participation.

When patients who were newly diagnosed or were already diagnosed as FMS visited the outpatient clinic in each participating centre, they were invited to join the study. After obtaining the informed consent from patients, we proceeded to the next step. Our study consisted of two parts, as shown in Fig. 1. For the first part we conducted a cross-sectional study using baseline data on all 2098 patients with FMS, irrespective of time of diagnosis, to estimate the economic burden associated with this disorder, such as health-care and non-health-care costs, indirect costs related to loss of productivity and HRQOL. To this end the subjects completed the SF-36 questionnaire at the time of enrolment. For the second part we conducted a prospective observational study targeting the 280 patients who were newly diagnosed with FMS to compare changes in costs and HRQOL 3 months before and after FMS diagnosis. Among the 280 newly diagnosed patients with FMS, 110 finished our study, but 170 failed to follow up 3 months after diagnosis.

Demographic characteristics such as age, gender, educational level, occupational status, type of health insurance (including medical insurance and medicaid), income level and smoking status were assessed via interviews during the study period (Table 1). The time since diagnosis and presence of rheumatic/non-rheumatic diseases were assessed via interviews and a review of medical records. Tender points at 18 specific sites in each patient were counted according to the standardized manual tender point survey [19]. We also measured the intensity of each tender point as described in our previous study [20] and the sum of these points served as the score for tender points. The patients were asked to complete the Korean version of the FIQ [21] and SF-36 [22] to assess the function and QOL in all patients at baseline, and the newly diagnosed patients were reassessed 3 months later.

### Estimation of health-care and non-health-care costs

The economic burden associated with FMS consists of direct and indirect costs [23, 24]. Direct costs were divided into two subgroups: direct health-care costs (i.e. outpatient and inpatient medical expenditure) and non-health-care costs (i.e. travel expenses, nursing costs and complementary/alternative treatment). Indirect costs (loss of productivity) were defined as the costs

Fig. 1 Summary of study design and population.

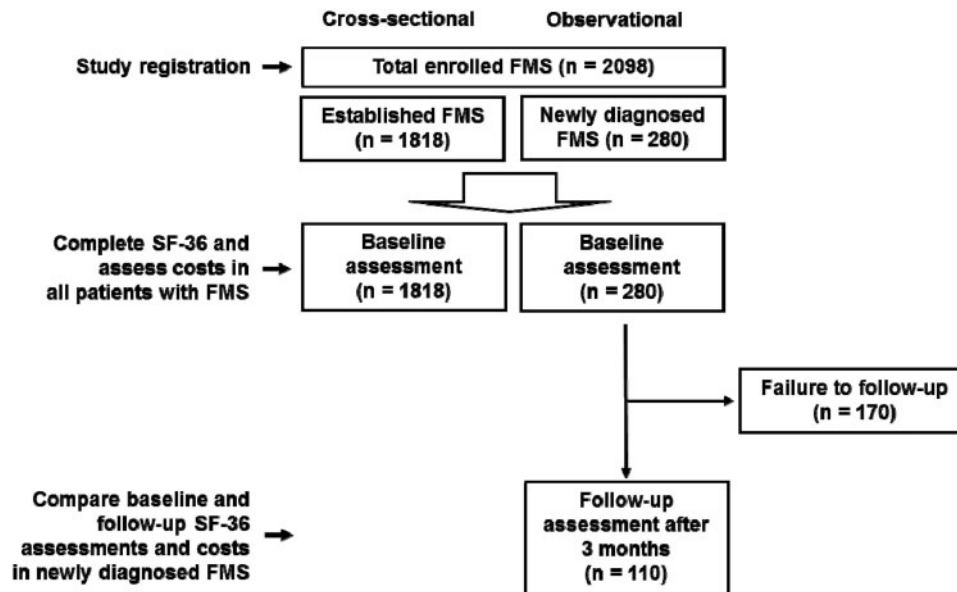

incurred as a result of lost workdays due to inpatient and outpatient visits to treat the disease and were estimated on the basis of the number of days ill or spent experiencing discomfort and the number of absences and early departures from work due to illness or discomfort. The analysis of direct health-care costs, direct non-health-care costs and indirect costs was based on expenditure for the treatment of FMS during the past 3 months; these data were collected via patient interviews. Direct health-care costs should include both co-pays, which were addressed on the patient questionnaire, and expenditure by National Health Insurance (NHI). Therefore co-pay rates for each service were verified to calculate expenditure by the NHI (Survey on the Benefit Coverage Rate of the NHI in 2008 issued by the NHI) before estimating the direct health-care costs attributable to illness. Indirect costs were calculated as follows: employment rate per age (Annual Report on the Economically Active Population Survey issued by the National Statistical Office in 2009)  $\times$  average daily wage (fixed hourly wage: Survey on Wage Structure issued by the Ministry of Labor in 2009). Data on the conversion of housework into wages provided by the Korean Women's Development Institute were used for housewives.

#### Statistical analysis

The data are described as means (s.d.s) or percentage (%) of cases. Comparisons between established and newly diagnosed patients with FMS in terms of socio-demographic and clinical characteristics, such as age, number of tender points, scores for tender points, FIQ scores and SF-36 scores, were measured by independent *t*-tests. Comparisons of the frequencies of categorical data, including gender, educational level, type of insurance, income level, occupational status, smoking status,

non-pain symptoms and co-morbidities, were analysed with the  $\chi^2$ -test. Additionally, a paired *t*-test was used to compare changes in the SF-36 and some parameters related to economic burden, including direct health-care, direct non-health-care and indirect costs pre- and post-initial FMS diagnosis. We confirmed that the data were normally distributed by plotting cumulative frequency against observed frequency and by performing tests for skewness and kurtosis and the Kolmogorov-Smirnov test. Determination of the risk factors for economic burden and HRQOL was performed by multiple linear regression analysis using socio-demographic and clinical characteristics as independent parameters and HRQOL and costs as dependent parameters.  $P < 0.05$  was considered statistically significant. Statistical analyses were performed with SAS version 9.1 (SAS Institute, Cary, NC, USA).

## Results

### Baseline demographic and clinical characteristics and FMS-related outcomes

The baseline characteristics of study participants are described in Table 1. The majority of enrolled subjects were female (92.71%) and the mean (s.d.) age of the sample was 49.93 (10.42) years. The established patients with FMS were significantly older than the newly diagnosed patients ( $P = 0.018$ ). The values for tender points differed significantly between established and newly diagnosed patients. The mean (s.d.) FIQ score in all patients with FMS was 61.45 (19.01) and the newly diagnosed patients with FMS obtained much higher scores than the established patients ( $P < 0.001$ ). The FIQ scores of patients with FMS with rheumatic and non-rheumatic diseases did not differ ( $P = 0.441$ ). Established and newly

**TABLE 1** Baseline socio-demographic and clinical characteristics of study patients with FM

| Clinical parameters                        | Total FMS (n = 2098) | Established FMS (n = 1818) | Newly diagnosed FMS (n = 280) | P      |
|--------------------------------------------|----------------------|----------------------------|-------------------------------|--------|
| Female, n (%)                              | 1945 (92.71)         | 1683 (92.57)               | 262 (93.57)                   | 0.550  |
| Age, mean (s.d.), years                    | 49.93 (10.42)        | 50.14 (10.41)              | 48.56 (10.41)                 | 0.018  |
| Time since diagnosis, n (%), years         |                      |                            |                               |        |
| <1                                         |                      | 783 (43.96)                |                               |        |
| 1–3                                        |                      | 577 (32.40)                |                               |        |
| >3                                         |                      | 421 (23.64)                |                               |        |
| Tender point                               |                      |                            |                               |        |
| Number of tender points, mean (s.d.), 0–18 | 12.81 (4.20)         | 12.62 (4.35)               | 14.01 (2.85)                  | <0.001 |
| Scores of tender points, mean (s.d.), 0–54 | 22.54 (12.01)        | 22.23 (12.27)              | 24.51 (10.01)                 | <0.001 |
| FIQ, mean (s.d.)                           | 61.45 (19.01)        | 60.90 (19.19)              | 64.96 (17.43)                 | <0.001 |
| Educational level, n (%)                   |                      |                            |                               |        |
| ≤Elementary school                         | 363 (17.30)          | 317 (17.44)                | 46 (16.43)                    | 0.801  |
| ≤Middle school                             | 360 (17.16)          | 312 (17.16)                | 48 (17.14)                    |        |
| ≤High school                               | 803 (38.27)          | 700 (38.50)                | 103 (36.79)                   |        |
| ≥University                                | 572 (27.26)          | 489 (26.90)                | 83 (29.64)                    |        |
| Type of health insurance, n (%)            |                      |                            |                               |        |
| Medical insurance                          | 1791 (85.37)         | 1549 (85.20)               | 242 (86.43)                   | 0.589  |
| Medicaid                                   | 307 (14.63)          | 269 (14.80)                | 38 (13.57)                    |        |
| Income level/month, n (%) <sup>a</sup>     |                      |                            |                               |        |
| <865                                       | 643 (30.75)          | 567 (31.31)                | 76 (27.14)                    | 0.320  |
| 874–1730                                   | 421 (20.13)          | 364 (20.10)                | 57 (20.36)                    |        |
| 1739–2595                                  | 395 (18.89)          | 348 (19.22)                | 47 (16.79)                    |        |
| 2604–3460                                  | 259 (12.39)          | 216 (11.93)                | 43 (15.36)                    |        |
| 3469–4325                                  | 159 (7.60)           | 133 (7.34)                 | 26 (9.29)                     |        |
| >4334                                      | 214 (10.23)          | 183 (10.10)                | 31 (11.07)                    |        |
| Occupational status, n (%)                 |                      |                            |                               |        |
| Employed                                   | 658 (31.36)          | 565 (31.08)                | 93 (33.21)                    | 0.473  |
| Not employed                               | 1440 (68.64)         | 1253 (68.92)               | 187 (66.79)                   |        |
| Smoking status, n (%)                      |                      |                            |                               |        |
| Smoker                                     | 196 (9.34)           | 164 (9.02)                 | 32 (11.43)                    | 0.198  |
| Non-smoker                                 | 1902 (90.66)         | 1654 (90.98)               | 248 (88.57)                   |        |
| Non-pain symptoms, n (%)                   |                      |                            |                               |        |
| Fatigue                                    | 1919 (91.47)         | 1662 (91.42)               | 257 (91.79)                   | 0.838  |
| Anxiety                                    | 1259 (60.01)         | 1093 (60.12)               | 166 (59.29)                   | 0.791  |
| Depression                                 | 1335 (63.63)         | 1152 (63.37)               | 183 (65.36)                   | 0.519  |
| Sleep disturbance                          | 1447 (68.97)         | 1246 (68.54)               | 201 (71.79)                   | 0.274  |
| Memory disturbance                         | 1564 (74.55)         | 1358 (74.70)               | 206 (73.57)                   | 0.687  |
| Other <sup>b</sup>                         | 130 (6.20)           | 112 (6.16)                 | 18 (6.43)                     | 0.863  |
| Co-morbidities, n (%)                      |                      |                            |                               |        |
| Rheumatic diseases                         |                      |                            |                               |        |
| RA                                         | 920 (43.85)          | 813 (44.72)                | 107 (38.21)                   | 0.041  |
| SLE                                        | 307 (14.63)          | 269 (14.80)                | 38 (13.57)                    | 0.589  |
| SS                                         | 66 (3.15)            | 61 (3.36)                  | 5 (1.79)                      | 0.161  |
| SS                                         | 52 (2.48)            | 47 (2.59)                  | 5 (1.79)                      | 0.423  |
| OA                                         | 290 (13.82)          | 251 (13.81)                | 39 (13.93)                    | 0.956  |
| AS                                         | 15 (0.71)            | 11 (0.61)                  | 4 (1.43)                      | 0.129  |
| SSc                                        | 6 (0.29)             | 5 (0.28)                   | 1 (0.36)                      | 0.577  |
| Inflammatory muscle disease                | 9 (0.43)             | 9 (0.50)                   | 0 (0.00)                      | 0.618  |
| Behçet's disease                           | 113 (5.39)           | 105 (5.78)                 | 8 (2.86)                      | 0.044  |
| Osteoporosis                               | 129 (6.15)           | 118 (6.49)                 | 11 (3.93)                     | 0.097  |
| Non-rheumatic diseases                     |                      |                            |                               |        |
| Hypothyroidism                             | 63 (3.00)            | 56 (3.08)                  | 7 (2.50)                      | 0.596  |
| Headache                                   | 417 (19.88)          | 355 (19.53)                | 62 (22.14)                    | 0.307  |
| Irritable bowel syndrome                   | 175 (8.34)           | 155 (8.53)                 | 20 (7.14)                     | 0.436  |
| Irritable bladder syndrome                 | 122 (5.82)           | 94 (5.17)                  | 28 (10.00)                    | 0.001  |

The response rate was not 100% for all questions. <sup>a</sup>Cost presented in US dollars. <sup>b</sup>Other includes constipation, dizziness, dyspepsia, anorexia, tinnitus and palpitation.

diagnosed groups did not differ significantly with respect to educational level, type of health insurance, income level, occupational status, smoking status and non-pain symptoms. Approximately 43.8% of the patients with FMS had co-morbid rheumatic diseases. Additionally, rheumatic diseases were more prevalent in established than in newly diagnosed patients ( $P=0.041$ ). In terms of non-rheumatic diseases, the prevalence of irritable bladder syndrome differed significantly between the two groups ( $P=0.001$ ).

The mean (s.d.) PCS and MCS scores in all patients with FMS were 34.01 (7.28) and 37.29 (11.17), respectively (Fig. 2). The mean PCS scores of the established and newly diagnosed patients with FMS were similar, whereas the newly diagnosed patients had lower MCS scores on the SF-36 than did the established patients ( $P=0.030$ ). As for individual SF-36 items, the two groups differed significantly with respect to bodily pain, vitality and role limitation due to emotional health ( $P < 0.001$ ,  $P=0.004$  and  $P=0.039$ , respectively). Those with FMS and non-rheumatic diseases reported better physical functioning on the SF-36 subscales ( $P=0.007$ ), whereas the results of the two groups on the other subscales were similar. Additionally, patients with FMS with both rheumatic and non-rheumatic diseases obtained similar scores on the PCS and MCS ( $P > 0.05$ ).

One hundred and ten of the 280 newly diagnosed patients with FMS completed this study. We found no significant differences in baseline characteristics between patients with FMS who did and did not complete the study (data not shown).

#### Analysis of health-related costs during the 3 months preceding diagnosis

Costs for the utilization of medical services are presented in Table 2. Direct health-care costs for the treatment of FMS for the 3 months before initial diagnosis were estimated at \$257 (s.d. \$615); these were chiefly attributable to costs related to outpatient rather than inpatient services. We found significant differences between the two groups in direct health-care costs ( $P=0.002$ ). Costs for newly diagnosed patients with FMS were nearly twice as high as for those with established FMS. Clinic visits among those newly diagnosed with FMS were more frequent than among those previously diagnosed with FMS ( $P=0.003$ ), whereas no differences in the frequencies and costs for hospital admissions were observed between the two groups ( $P > 0.05$ ).

In contrast, direct non-health-care costs, including travel expenses, costs for nursing and costs for complementary/alternative therapies were estimated at \$74 (s.d. \$330). We found no significant differences between the two groups in direct non-health-care costs. Costs for complementary or alternative treatments used to manage FMS accounted for a greater proportion of non-health-care costs.

Indirect costs related to loss of productivity were estimated at \$1126 (s.d. \$2016). However, the indirect costs of the two groups were similar. Although total direct costs differed significantly between the two groups and were 1.7 times higher in the newly diagnosed than in the established patients with FMS ( $P=0.001$ ), the total expenditure was not different between the two groups (\$1412 vs \$1679,  $P=0.086$ ).

Fig. 2 Mean scores of individual components of the SF-36 questionnaire in patients with FM.

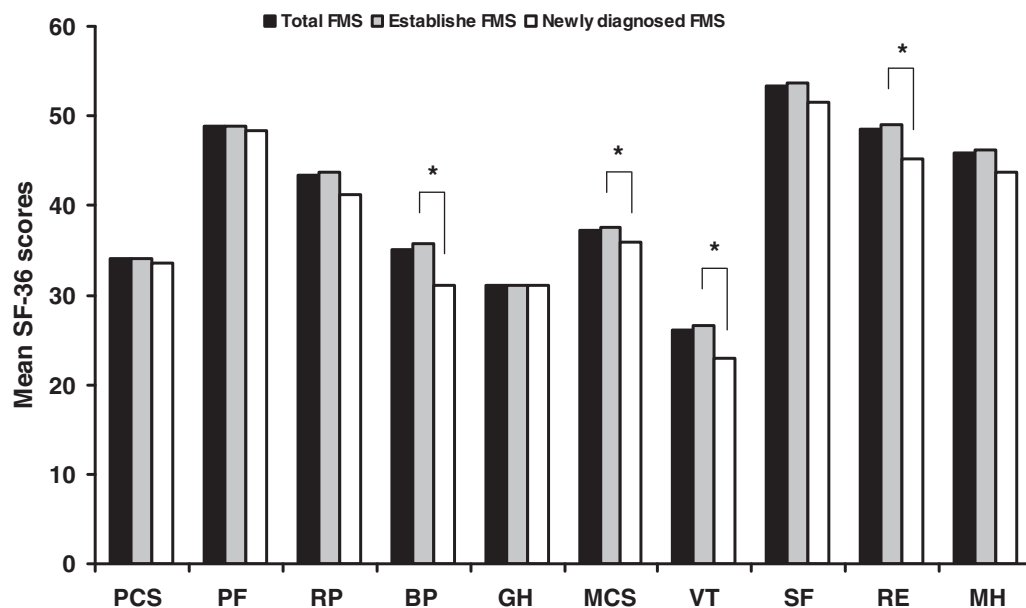

Asterisk indicates statistical significance at the 0.05 level between the established and newly diagnosed FMS patients. PF: physical functioning; RP: role limitation due to physical health; BP: bodily pain; GH: general health perception; VT: vitality; SF: social functioning; RE: role limitation due to emotional health; MH: mental health.

**TABLE 2** Analysis of health-related costs and productivity loss during the 3 months preceding diagnosis

| Individual costs                                        | Total FMS (n = 2098) | Established FMS (n = 1818) | Newly diagnosed FMS (n = 280) | P      |
|---------------------------------------------------------|----------------------|----------------------------|-------------------------------|--------|
| Health-related costs                                    |                      |                            |                               |        |
| Direct costs <sup>a</sup>                               | 355 (534)            | 217 (433)                  | 366 (756)                     | 0.001  |
| Direct health-care costs <sup>a</sup>                   | 257 (615)            | 227 (524)                  | 417 (966)                     | 0.002  |
| Number of outpatient clinic visits                      | 3.60 (6.95)          | 3.32 (5.92)                | 5.39 (11.43)                  | 0.003  |
| Total cost for outpatient clinics <sup>a</sup>          | 217 (489)            | 190 (165)                  | 392 (769)                     | <0.001 |
| Number of admissions                                    | 0.06 (0.34)          | 0.06 (0.34)                | 0.07 (0.36)                   | 0.624  |
| Total cost for admissions <sup>a</sup>                  | 40 (275)             | 40 (274)                   | 35 (283)                      | 0.788  |
| Direct non-health-care costs <sup>a</sup>               | 74 (330)             | 67 (239)                   | 80 (264)                      | 0.438  |
| Travel expenses <sup>a</sup>                            | 9 (16)               | 9 (16)                     | 9 (17)                        | 0.893  |
| Cost of nursing <sup>a</sup>                            | 6 (122)              | 4 (107)                    | 16 (193)                      | 0.310  |
| Use of complementary/alternative medicine, n (%)        | 635 (30.27)          | 547 (30.09)                | 88 (31.43)                    | 0.650  |
| Cost of complementary/alternative medicine <sup>a</sup> | 84 (306)             | 85 (317)                   | 75 (222)                      | 0.500  |
| Indirect costs (productivity loss) <sup>a</sup>         | 1126 (2016)          | 1118 (2001)                | 1182 (2107)                   | 0.618  |
| Total expenditure <sup>a,b</sup>                        | 1481 (2206)          | 1412 (2134)                | 1679 (2450)                   | 0.086  |
| Productivity loss                                       |                      |                            |                               |        |
| Experience of work loss, n (%)                          | 338 (24.51)          | 299 (24.96)                | 39 (21.55)                    | 0.320  |
| Days ill                                                | 44.04 (39.82)        | 43.22 (39.54)              | 49.34 (41.24)                 | 0.017  |
| Days absent due to illness                              | 15.55 (26.99)        | 15.44 (26.84)              | 16.24 (27.99)                 | 0.647  |
| Days left early due to illness                          | 20.34 (30.39)        | 19.87 (29.90)              | 23.45 (33.30)                 | 0.090  |
| Reduced efficiency while working or studying, n (%)     | 1241 (59.15)         | 1079 (59.35)               | 162 (57.86)                   | 0.636  |

The response rate was not 100% for all questions. Unless otherwise indicated, data are shown as mean (s.d.). <sup>a</sup>Cost presented in US dollars. <sup>b</sup>Total expenditure: the sum of direct health-care costs, direct non-health-care costs and indirect costs.

About 24% of the patients with FMS experienced loss of work due to illness (Table 2). Approximately 44 days were spent suffering from FMS-related symptoms and signs. Additionally, newly diagnosed patients with FMS reported a greater number of sick days than did established patients with FMS ( $P = 0.017$ ). Our data showed that more than half the patients with FMS felt less efficient at work or during the period of the study, although no significant difference was observed between the two groups in this regard.

#### Determination of risk factors for costs for medical services during the 3 months preceding diagnosis

Direct outpatient and inpatient health-care costs were significantly related to a new diagnosis of FMS, the presence of non-rheumatic diseases and higher levels of income ( $P < 0.001$ ,  $P = 0.001$  and  $P = 0.021$ , respectively) (Table 3). Additionally, income level and fatigue were risk factors for direct non-health-care costs ( $P = 0.024$  and  $P = 0.043$ , respectively). Parameters related to indirect costs included younger age, being female, medicaid, work loss, anxiety and sleep disturbance. Overall, greater total expenditure was found in younger females with non-rheumatic diseases, medicaid, unemployed status and non-pain symptoms including anxiety and sleep disturbance.

#### Comparison of economic burden and SF-36 scores 3 months before and after diagnosis

Scores on both the PCS and MCS significantly increased at the 3-month follow-up after FMS diagnosis compared

with their baseline values ( $P < 0.001$ , both) (Table 4). Similarly, both direct and indirect health-care costs were markedly lower 3 months after diagnosis than at baseline ( $P < 0.001$ , both), whereas direct non-health-care costs did not change during this period. Overall, total expenditures were statistically reduced from \$2139 (s.d. \$1839) during the 3 months before diagnosis to \$1114 (s.d. \$1995) during the 3 months after diagnosis ( $P < 0.001$ ).

## Discussion

This study demonstrated that FMS patients experience significantly impaired HRQOL and higher health-service costs. In particular, newly diagnosed patients had higher mental disability and higher direct health-care costs than did the established patients. A significant reduction in the economic burden and an improvement in HRQOL were demonstrated after FMS diagnosis.

The mean (s.d.) PCS and MCS scores of the patients in this study were 34.01 (7.28) and 37.29 (11.17), respectively, which are similar to those reported by previous studies [4, 6, 8–10]. When the SF-36 scores of our patients were compared with those in the healthy Korean population [25, 26], the FMS patients reported markedly lower scores on all subscales of the SF-36, indicating significantly impaired QOL. Additionally, we found no differences between established and newly diagnosed patients with FMS with respect to PCS scores on the SF-36, whereas newly diagnosed patients with FMS had lower MCS scores, which indicates increased susceptibility to psychosomatic distress.

TABLE 3 Regression coefficients for health-related costs by socio-demographic and clinical parameters

| Clinical parameters                        | Direct costs      |         |                       |       |                                       |         | Total expenditure |         |                   |         |                   |         |
|--------------------------------------------|-------------------|---------|-----------------------|-------|---------------------------------------|---------|-------------------|---------|-------------------|---------|-------------------|---------|
|                                            | Health-care costs |         | Non-health-care costs |       | Health-care and non-health-care costs |         | Indirect costs    |         | Total expenditure |         | Total expenditure |         |
|                                            | $\beta$           | P       | $\beta$               | P     | $\beta$                               | P       | $\beta$           | P       | $\beta$           | P       | $\beta$           | P       |
| Age, years                                 | 1                 | 0.707   | 0                     | 0.882 | 1                                     | 0.691   | -16               | < 0.001 | -16               | < 0.001 | -16               | 0.002   |
| Sex (ref: male)                            |                   |         |                       |       |                                       |         |                   |         |                   |         |                   |         |
| Female                                     | -57               | 0.288   | 22                    | 0.321 | -35                                   | 0.548   | 759               | < 0.001 | 724               | < 0.001 | 724               | < 0.001 |
| Time since diagnosis                       | -1                | 0.140   | 0                     | 0.889 | -1                                    | 0.196   | 0                 | 0.860   | -1                | 0.558   | -1                | 0.558   |
| New patient (ref: established patient)     | 161               | < 0.001 | 10                    | 0.561 | 171                                   | < 0.001 | 52                | 0.669   | 223               | 0.096   | 223               | 0.096   |
| Newly diagnosed patient                    |                   |         |                       |       |                                       |         |                   |         |                   |         |                   |         |
| Co-morbidity (ref: non-rheumatic diseases) | -88               | 0.001   | -8                    | 0.468 | -96                                   | 0.001   | -109              | 0.183   | -205              | 0.023   | -205              | 0.023   |
| Rheumatic diseases                         |                   |         |                       |       |                                       |         |                   |         |                   |         |                   |         |
| Education level (ref: < high school)       | 12                | 0.711   | 24                    | 0.082 | 36                                    | 0.325   | -129              | 0.200   | -93               | 0.403   | -93               | 0.403   |
| ≥ High school                              |                   |         |                       |       |                                       |         |                   |         |                   |         |                   |         |
| Insurance (ref: medicaid)                  | 57                | 0.157   | 13                    | 0.449 | 70                                    | 0.116   | -710              | < 0.001 | -640              | < 0.001 | -640              | < 0.001 |
| Medical insurance                          |                   |         |                       |       |                                       |         |                   |         |                   |         |                   |         |
| Income level/month                         | 22                | 0.021   | 9                     | 0.024 | 31                                    | 0.003   | -17               | 0.564   | 14                | 0.654   | 14                | 0.654   |
| Occupational status (ref: unemployed)      |                   |         |                       |       |                                       |         |                   |         |                   |         |                   |         |
| Employed                                   | -19               | 0.540   | 14                    | 0.243 | -4                                    | 0.900   | -1515             | < 0.001 | -1519             | < 0.001 | -1519             | < 0.001 |
| Smoking status (ref: smoker)               |                   |         |                       |       |                                       |         |                   |         |                   |         |                   |         |
| Non-smoker                                 | -15               | 0.752   | -18                   | 0.350 | -33                                   | 0.525   | -67               | 0.641   | -100              | 0.527   | -100              | 0.527   |
| Non-painful symptoms                       |                   |         |                       |       |                                       |         |                   |         |                   |         |                   |         |
| Fatigue (ref: no)                          |                   |         |                       |       |                                       |         |                   |         |                   |         |                   |         |
| Yes                                        | -69               | 0.162   | -41                   | 0.043 | -110                                  | 0.043   | 129               | 0.390   | 18                | 0.912   | 18                | 0.912   |
| Anxiety (ref: no)                          |                   |         |                       |       |                                       |         |                   |         |                   |         |                   |         |
| Yes                                        | 55                | 0.103   | 14                    | 0.300 | 70                                    | 0.061   | 378               | < 0.001 | 448               | < 0.001 | 448               | < 0.001 |
| Depression (ref: no)                       |                   |         |                       |       |                                       |         |                   |         |                   |         |                   |         |
| Yes                                        | 34                | 0.316   | -2                    | 0.911 | 33                                    | 0.384   | 146               | 0.160   | 179               | 0.119   | 179               | 0.119   |
| Sleep disturbance (ref: no)                |                   |         |                       |       |                                       |         |                   |         |                   |         |                   |         |
| Yes                                        | 59                | 0.056   | 15                    | 0.250 | 74                                    | 0.030   | 217               | 0.020   | 291               | 0.005   | 291               | 0.005   |
| Memory disturbance (ref: no)               |                   |         |                       |       |                                       |         |                   |         |                   |         |                   |         |
| Yes                                        | -4                | 0.908   | 7                     | 0.596 | 3                                     | 0.927   | 23                | 0.818   | 26                | 0.811   | 26                | 0.811   |

**TABLE 4** Comparison of SF-36 and costs 3 months before and after diagnosis of FM

| Variable                                   | Baseline<br>(n = 110) | Follow-up<br>(n = 110) | P      |
|--------------------------------------------|-----------------------|------------------------|--------|
| SF-36                                      |                       |                        |        |
| PCS                                        | 32.44 (6.24)          | 36.47 (7.43)           | <0.001 |
| MCS                                        | 35.26 (10.81)         | 39.32 (10.33)          | <0.001 |
| Costs <sup>a</sup>                         |                       |                        |        |
| Direct health-care costs                   | 337 (338)             | 135 (191)              | <0.001 |
| Direct non-health-care costs               | 98 (257)              | 43 (189)               | 0.095  |
| Direct health-care + non-health-care costs | 419 (507)             | 176 (287)              | 0.001  |
| Indirect costs                             | 1722 (1691)           | 824 (1635)             | <0.001 |
| Total expenditure <sup>b</sup>             | 2139 (1839)           | 1114 (1995)            | <0.001 |

Data are shown as mean (s.d.). <sup>a</sup>Cost presented in US dollars. <sup>b</sup>Total expenditure: the sum of direct health-care costs, direct non-health-care costs and indirect costs.

In addition to the increased risk of lower QOL in FMS, economic consequences related to FMS should also be a focus. It has been agreed that FMS is associated with significantly high health-care costs [12–17], although studies have differed in terms of health-care systems, study populations, analytical methods and study design. In our study the average baseline total economic costs during the 3 months before the initial diagnosis were \$1481 (s.d. \$2206) in 2098 patients with FMS. A recent study of 1338 Korean patients with diabetes mellitus (DM) and peripheral neuropathy showed that the direct and indirect costs during the 3 months preceding diagnosis were \$356 (s.d. \$893) [27]. The total costs during the 3 months before initial diagnosis in FMS patients were four times higher than those in patients with DM and peripheral neuropathy. Similarly Berger *et al.* [12] demonstrated that the total health-care costs over 12 months in 33 176 patients with FMS were approximately three times higher than those in the comparison group [\$9573 (s.d. \$20 135) vs \$3291 (s.d. \$13 643)]. This suggests that patients with FMS may be considered to have higher health-service costs compared with patients with other chronic diseases.

It is suggested that indirect costs should be included in actual estimations of the economic impact of FMS. Wolfe *et al.* [17] reported that the average yearly cost for the high utilization of medical services was \$2274, adjusted for 1996 costs, in a 7-year prospective and longitudinal study among 538 patients with FMS. They assessed only direct medical costs such as hospitalization, drugs and outpatient visits. Among their cost sources, hospitalization was identified as a main contributor to direct medical costs. Several studies evaluating both direct and indirect costs have shown that indirect costs overwhelmingly exceeded direct costs [14, 15]. Mean (s.d.) direct costs were estimated at Can\$2298 (Can\$2303) in an assessment of the 6-month costs for 180 Canadian women with primary FMS, whereas the indirect costs were twice as high, at Can\$5035 (s.d. Can\$7439) [14]. The predominance of indirect costs in the economic burden of FMS was also confirmed by data from a multicentre FMS study in Spain [15]. These findings are in accordance with our

results that 75% of the total costs for FMS were attributable to indirect costs.

Interest in the determinants of the economic burden of FMS has been increasing. Several investigators have tried to identify causal factors related to health-related costs. Measures of FMS disability (FIQ and health assessment questionnaire scores) and the number of co-morbidities have been significantly associated with the direct costs incurred by patients with FMS [14, 17]. Furthermore, it has recently been reported that the increased economic burden is primarily attributable to functional ability, depression, co-morbidities and younger age [15]. The evidence suggests that the severity of FMS, including the ability to work and co-morbid disorders, may influence the economic burden associated with this disorder. In the current study, the risk factors for FMS-related costs were younger age, being female, co-morbid disorders, insurance type, being employed and non-painful symptoms. The risk factors identified in our study are consistent with those identified in earlier studies [14, 15, 17].

In this study we prospectively investigated changes in two summary scores of the SF-36 questionnaire and the health-related costs (direct and indirect) 3 months before and after the initial diagnosis of FMS. The results showed significantly improved PCS and MCS scores and reduced health-service utilization costs, including direct and indirect costs. Hughes *et al.* [13] demonstrated that the high number of clinic visits, diagnostic tests and prescriptions before FMS diagnosis were significantly reduced after diagnosis, although these rates increased within 2–3 years. This finding is in line with our data, suggesting that the actual FMS diagnosis should result in alleviating FMS-related symptoms. In contrast, Boehm *et al.* [10] showed that longer disease duration rather than actual diagnosis of FMS was closely related to QOL and functioning. Unfortunately, sufficient data on health-related costs before and after FMS diagnosis were not available in the above-mentioned study. A UK study was conducted to calculate the number of clinic visits, prescriptions and diagnostic tests at 6-month intervals from 10 years before to 4 years after FMS diagnosis [13]. These rates were markedly reduced after diagnosis. Despite only



3 months of follow-up, our study suggests that early diagnosis of FMS may contribute to reducing the economic burden associated with this disorder. Based on the UK study and our data, we suggest that actual diagnosis can help reduce FMS-related costs. Considering that the average time taken for FMS diagnosis is >2 years and patients report seeing between two and four physicians before a diagnosis is made [28], it is recommended that efforts to facilitate FMS diagnosis and start medication earlier are needed to decrease the economic burden and improve HRQOL.

Our study has some limitations. First, 43.9% of total patients had co-morbid rheumatic diseases because this study was conducted in the rheumatology outpatient clinic. Although we asked patients to answer the costs directly related to FM during the interview and it was emphasized that the costs should be related to FM in the questionnaire questions, costs may be overestimated because of costs related to accompanying rheumatic diseases. Secondly, we were able to obtain follow-up on only 39% of the newly diagnosed patients. This study is a nationwide survey conducted in 44 medical centres across the country. The centres joined the study voluntarily and it was impossible to collect the Case Record Forms fully. Although there were no significant differences in baseline characteristics between patients who did and did not complete the study, improved patients were more likely to be followed up than unimproved patients. Thirdly, the estimation of costs was largely based on patient's recall. Like other studies of this kind, our study could be subject to recall bias to a certain degree.

In conclusion, we found a greater economic burden and a decreased HRQOL among Korean patients with FMS, particularly in newly diagnosed patients. This 3-month follow-up observational study demonstrated a significant reduction in the economic burden and an improvement in the HRQOL after FMS diagnosis compared with before FMS diagnosis, implying the need for early diagnosis. The impact of actual FMS diagnosis on the HRQOL and health-related costs should be confirmed by longer-term studies with larger samples.

#### Rheumatology key messages

- Patients with FM have significantly impaired HRQOL and have higher health-service costs in Korea.
- Early diagnosis of FM can improve the HRQOL and reduce the economic burden.

## Acknowledgements

The authors wish to thank the Korean Fibromyalgia Study Group, who generously gave their time during the study period. We would also like to thank Professor Ki Jun Song, Department of Health statistics, Yonsei University School of Medicine, Seoul, Korea, for assistance with the statistical analysis. We thank the following investigators: Han Joo Baek, Gachon University Gil Hospital, Incheon,

Republic of Korea; Ji-Young Chai, Bundang Jesang Hospital, Gyeonggi-do, Republic of Korea; Jin-Jung Choi, CHA University, Bundang CHA General Hospital, Sungnam, Republic of Korea; Sung-Jae Choi, Korea University Ansan Hospital, Ansan, Republic of Korea; Won-Tae Chung, Dong-A University College of Medicine, Busan, Republic of Korea; Seong Hoon Han, Inje University Sanggye Paik-Hospital, Seoul, Republic of Korea; Seung Woo Han, Daegu Fatima Hospital, Daegu, Republic of Korea; Seung-Jae Hong, Kyunghee University Hospital, Seoul, Republic of Korea; Yeon-Sik Hong, Catholic University of Korea, Incheon St Mary's Hospital, Incheon, Republic of Korea; Jin-Wuk Hur, Eulji General Hospital, Seoul, Republic of Korea; Chan Hong Jeon, Soonchunhyang University Bucheon Hospital, Gyeonggi-do, Republic of Korea; Chung-Il Joung, Konyang University Hospital, Daejeon, Republic of Korea; Tae-Young Kang, Yonsei University Wonju College of Medicine, Wonju Christian Hospital, Kangwon-do, Republic of Korea; Hak-Jun Kim, Ulsan Donggang Medical Center, Ulsan, Republic of Korea; Hyoun Ah Kim, Ajou University Hospital, Suwon, Republic of Korea; Hyun-Sook Kim, Chosun University Hospital, Gwangju, Republic of Korea; Il Kim, Dankook University Hospital, Chungcheongnam-do, Republic of Korea; In Je Kim, Hallym University Medical Center, Kangdong Sacred Heart Hospital, Seoul, Republic of Korea; Sang-Hyon Kim, Keimyung University Dongsan Hospital, Daegu, Republic of Korea; Wan-Uk Kim, Catholic University of Korea, St Vincent's Hospital, Suwon, South Korea; Yun-A Kim, Gwangju Christian Hospital, Gwangju, Republic of Korea; Seong-Ryul Kwon, Inha University Hospital, Incheon, Republic of Korea; Choong Won Lee, Wallace Memorial Baptist Hospital, Busan, Republic of Korea; Ji Hyun Lee, Maryknoll Medical Center, Busan, Republic of Korea; Jisoo Lee, Ewha Womans University Medical Center, Seoul, Republic of Korea; Myeung-Su Lee, Wonkwang University Hospital, Iksan, Republic of Korea; Young Ho Lee, Korea University Anam Hospital, Seoul, Republic of Korea; Jun-Ki Min, Catholic University of Korea, Holy Family Hospital, Bucheon, Republic of Korea; Seong-Su Nah, Soonchunhyang University Cheonan Hospital, Cheonan, Republic of Korea; Dong Ho Oh, Pohang St Mary's Hospital, Kyungbook, Republic of Korea; Min-Chan Park, Gangnam Severance Hospital, Seoul, Republic of Korea; Seung-Cheol Shim, Eulji University Hospital, Daejeon, Republic of Korea; Jung-Soo Song, Chung-Ang University Hospital, Seoul, Republic of Korea; Yeong Wook Song, Seoul National University Hospital, Seoul, Republic of Korea; Wan-Hee Yoo, Chonbuk National University Hospital, Jeonju, Republic of Korea; Bo-Young Yoon, Inje University Ilsan Paik Hospital, Goyang, Republic of Korea; and Chong-Hyeon Yoon, Catholic University of Korea Uijeongbu St Mary's Hospital, Gyeonggi-do, Republic of Korea.

**Funding:** This work was supported by Pfizer Pharmaceuticals Korea Ltd.

**Disclosure statement:** M.-J.S. is a former employee of Pfizer Pharmaceuticals Korea, Ltd. H.-J.P. is an employee of Pfizer Pharmaceuticals Korea, Ltd. All other authors have declared no conflicts of interest.

## References

- Clauw DJ, Crofford LJ. Chronic widespread pain and fibromyalgia: what we know, and what we need to know. *Best Pract Res Clin Rheumatol* 2003;17:685–701.
- Bennett RM, Jones J, Turk DC, Russell IJ, Matallana L. An internet survey of 2,596 people with fibromyalgia. *BMC Musculoskelet Disord* 2007;8:27.
- Burckhardt CS, Clark SR, Bennett RM. Fibromyalgia and quality of life: a comparative analysis. *J Rheumatol* 1993; 20:475–9.
- Birtane M, Uzunca K, Tastekin N, Tuna H. The evaluation of quality of life in fibromyalgia syndrome: a comparison with rheumatoid arthritis by using SF-36 Health Survey. *Clin Rheumatol* 2007;26:679–84.
- Da Costa D, Dobkin PL, Fitzcharles MA *et al.* Determinants of health status in fibromyalgia: a comparative study with systemic lupus erythematosus. *J Rheumatol* 2000;27: 365–72.
- Hoffman DL, Dukes EM. The health status burden of people with fibromyalgia: a review of studies that assessed health status with the SF-36 or the SF-12. *Int J Clin Pract* 2008;62:115–26.
- Kaplan RM, Schmidt SM, Cronan TA. Quality of well being in patients with fibromyalgia. *J Rheumatol* 2000;27:785–9.
- Martinez JE, Barauna Filho IS, Kubokawa K, Pedreira IS, Machado LA, Cevalco G. Evaluation of the quality of life in Brazilian women with fibromyalgia, through the medical outcome survey 36 item short-form study. *Disabil Rehabil* 2001;23:64–8.
- Salaffi F, Sarzi-Puttini P, Girolimetti R, Atzeni F, Gasparini S, Grassi W. Health-related quality of life in fibromyalgia patients: a comparison with rheumatoid arthritis patients and the general population using the SF-36 health survey. *Clin Exp Rheumatol* 2009;27:S67–74.
- Boehm A, Eisenberg E, Lampel S. The contribution of social capital and coping strategies to functioning and quality of life of patients with fibromyalgia. *Clin J Pain* 2011;27:233–9.
- Ubago Linares Mdel C, Ruiz-Perez I, Bermejo Perez MJ, Olry de Labry-Lima A, Hernandez-Torres E, Plazaola-Castano J. Analysis of the impact of fibromyalgia on quality of life: associated factors. *Clin Rheumatol* 2008;27: 613–9.
- Berger A, Dukes E, Martin S, Edelsberg J, Oster G. Characteristics and healthcare costs of patients with fibromyalgia syndrome. *Int J Clin Pract* 2007;61:1498–508.
- Hughes G, Martinez C, Myon E, Taieb C, Wessely S. The impact of a diagnosis of fibromyalgia on health care resource use by primary care patients in the UK: an observational study based on clinical practice. *Arthritis Rheum* 2006;54:177–83.
- Penrod JR, Bernatsky S, Adam V, Baron M, Dayan N, Dobkin PL. Health services costs and their determinants in women with fibromyalgia. *J Rheumatol* 2004;31:1391–8.
- Rivera J, Rejas J, Esteve-Vives J, Vallejo MA. Resource utilisation and health care costs in patients diagnosed with fibromyalgia in Spain. *Clin Exp Rheumatol* 2009;27: S39–45.
- White KP, Speechley M, Harth M, Ostbye T. The London Fibromyalgia Epidemiology Study: direct health care costs of fibromyalgia syndrome in London, Canada. *J Rheumatol* 1999;26:885–9.
- Wolfe F, Anderson J, Harkness D *et al.* A prospective, longitudinal, multicenter study of service utilization and costs in fibromyalgia. *Arthritis Rheum* 1997;40:1560–70.
- Wolfe F, Smythe HA, Yunus MB *et al.* The American College of Rheumatology 1990 Criteria for the Classification of Fibromyalgia. Report of the Multicenter Criteria Committee. *Arthritis Rheum* 1990;33:160–72.
- Okifuji A, Turk DC, Sinclair JD, Starz TW, Marcus DA. A standardized manual tender point survey. I. Development and determination of a threshold point for the identification of positive tender points in fibromyalgia syndrome. *J Rheumatol* 1997;24:377–83.
- Lee SS, Yoon HJ, Chang HK, Park KS. Fibromyalgia in Behcet's disease is associated with anxiety and depression, and not with disease activity. *Clin Exp Rheumatol* 2005;23:S15–9.
- Kim YA, Lee SS, Park K. Validation of a Korean version of the Fibromyalgia Impact Questionnaire. *J Korean Med Sci* 2002;17:220–4.
- Han CW, Lee EJ, Iwaya T, Kataoka H, Kohzuki M. Development of the Korean version of Short-Form 36-Item Health Survey: health related QOL of healthy elderly people and elderly patients in Korea. *Tohoku J Exp Med* 2004;203:189–94.
- Kim HJ, Park TK, Jee SH, Kang HY, Nam CM. Analysis of socioeconomic costs of smoking in Korea. *Korean J Prev Med* 2001;34:183–90.
- Rice DP, Hodgson TA, Sinsheimer P, Browner W, Kopstein AN. The economic costs of the health effects of smoking, 1984. *Milbank Q* 1986;64:489–547.
- Kim SA, Park KS, Jang MK, Kam S. Medical facilities utilization according to health status measured by SF-36 in male workers. *Korean J Occup Environ Med* 2006;18: 272–83.
- Park HJ, Kim S, Yong JS *et al.* Reliability and validity of the Korean version of Kidney Disease Quality of Life instrument (KDQOL-SF). *Tohoku J Exp Med* 2007;211:321–9.
- Ko KS, Cha BY, Kim CH *et al.* Economic burden of diabetic peripheral neuropathy in Korea. *Value Health* 2010; 13:A228.
- Choy E, Perrot S, Leon T *et al.* A patient survey of the impact of fibromyalgia and the journey to diagnosis. *BMC Health Serv Res* 2010;10:102.
